# Supplementary material
Source: PubMed Central journal article supplement (PMC4249516)
Supplement: AAC.03730-14_zac012143498so1.pdf [file AAC.03730-14_zac012143498so1.pdf]

**Table S1. *A. salmonicida* subsp. *salmonicida* isolates used in this study**

| Name       | Origin <sup>a</sup>          | Source and/or reference <sup>b</sup> | Antibiotic resistance <sup>c</sup> |
|------------|------------------------------|--------------------------------------|------------------------------------|
| 01-B522    | Brook trout (QC, Canada)     | FMVUM, (1)                           | SXT, TET, TMP                      |
| 01-B526    | Brook trout (QC, Canada)     | FMVUM, (2)                           | -                                  |
| 01-B516    | Brook trout (QC, Canada)     | FMVUM, (1)                           | -                                  |
| HER1098    | * (USA)                      | FHRC, (3)                            | -                                  |
| HER1110    | * (Japan)                    | FHRC, (4)                            | -                                  |
| HER1108    | * (Denmark)                  | FHRC, (4)                            | -                                  |
| HER1104    | * (France)                   | FHRC                                 | -                                  |
| HER1085    | *                            | FHRC                                 | -                                  |
| HER1084    | * (France)                   | FHRC, (4)                            | -                                  |
| HER1107    | *                            | FHRC                                 | TET                                |
| A449       | Brown trout (France)         | (5)                                  | STR, TET, CHL                      |
| 07-9324    | Brook trout (QC, Canada)     | FMVUM                                | STR, AMP, TET, CHL                 |
| 07-7817    | * (QC, Canada)               | FMVUM                                | STR, AMP, TET, CHL                 |
| 07-7346    | Atlantic salmon (QC, Canada) | FMVUM                                | -                                  |
| 07-5957    | Atlantic salmon (QC, Canada) | FMVUM                                | NAL                                |
| 08-2647    | Brook trout (QC, Canada)     | FMVUM                                | SXT, STR, AMP, TET                 |
| 09-0167    | Atlantic salmon (QC, Canada) | FMVUM                                | NAL                                |
| 07-7287    | Brook trout (QC, Canada)     | FMVUM                                | STR, AMP, TET, CHL                 |
| 08-2783    | Brook trout (QC, Canada)     | FMVUM                                | STR, AMP, TET                      |
| 08-4188    | Brook trout (QC, Canada)     | FMVUM                                | STR, AMP, TET, CHL                 |
| 5093-3     | Brook trout (QC, Canada)     | MAPAQ                                | -                                  |
| 5093-4     | Brook trout (QC, Canada)     | MAPAQ                                | -                                  |
| 5490-1     | Brook trout (QC, Canada)     | MAPAQ                                | -                                  |
| 5490-2     | Brook trout (QC, Canada)     | MAPAQ                                | -                                  |
| 5490-4     | Brook trout (QC, Canada)     | MAPAQ                                | -                                  |
| 5490-5     | Brook trout (QC, Canada)     | MAPAQ                                | -                                  |
| 5704-1     | Brook trout (QC, Canada)     | MAPAQ                                | -                                  |
| 5704-2     | Brook trout (QC, Canada)     | MAPAQ                                | -                                  |
| 5704-4     | Brook trout (QC, Canada)     | MAPAQ                                | -                                  |
| 5704-5     | Brook trout (QC, Canada)     | MAPAQ                                | -                                  |
| 5704-6     | Brook trout (QC, Canada)     | MAPAQ                                | -                                  |
| 5704-3     | Brook trout (QC, Canada)     | MAPAQ                                | -                                  |
| m17524-09  | Brook trout (QC, Canada)     | FMVUM                                | -                                  |
| m14349-09  | Atlantic salmon (QC, Canada) | FMVUM                                | STR, CHL                           |
| m23281-09  | Brook trout (QC, Canada)     | FMVUM                                | -                                  |
| m23067-09  | Brook trout (QC, Canada)     | FMVUM                                | -                                  |
| m19438-09  | Brook trout (QC, Canada)     | FMVUM                                | -                                  |
| m16583-09  | Brook trout (QC, Canada)     | FMVUM                                | -                                  |
| m14231-09  | Atlantic salmon (QC, Canada) | FMVUM                                | -                                  |
| m11743-09  | Brook trout (QC, Canada)     | FMVUM                                | -                                  |
| m11431-09  | Brook trout (QC, Canada)     | FMVUM                                | -                                  |
| m10419-09  | Brook trout (QC, Canada)     | FMVUM                                | -                                  |
| m9906-09   | Brook trout (QC, Canada)     | FMVUM                                | STR, CHL                           |
| m9954-10   | Brook trout (QC, Canada)     | FMVUM                                | -                                  |
| m8029-10   | Brook trout (QC, Canada)     | FMVUM                                | -                                  |
| m11603-10  | Brook trout (QC, Canada)     | FMVUM                                | -                                  |
| m6363-10   | Brook trout (QC, Canada)     | FMVUM                                | -                                  |
| m9221-10   | Brook trout (QC, Canada)     | FMVUM                                | -                                  |
| 2009-178K9 | Atlantic salmon (NB, Canada) | FOC                                  | STR, ERY                           |

|             |                              |       |                                        |
|-------------|------------------------------|-------|----------------------------------------|
| 2009-157K5  | Brook trout (NB, Canada)     | FOC   | STR, TET, ERY                          |
| 2010-47K18  | Brook trout (NB, Canada)     | FOC   | STR, TET, CHL                          |
| 2004-05MF26 | * (NB, Canada)               | FOC   | NAL, SXT, STR, AMP, TET, ERY, GEN, CHL |
| 2004-68K52  | Atlantic salmon (NS, Canada) | FOC   | NAL, SXT, STR, AMP, TET, CHL           |
| 2009-195K29 | Brook trout (NB, Canada)     | FOC   | STR, TET, ERY                          |
| 2005-70     | * (NB, Canada)               | FOC   | STR, ERY, GEN                          |
| 2009-144K3  | Brook trout (NB, Canada)     | FOC   | SXT, STR, TET, ERY, CHL                |
| 2005-175K2  | Brook trout (NB, Canada)     | FOC   | STR, ERY                               |
| 2004-208    | *                            | FOC   | STR, ERY                               |
| M10935-11   | Brook trout (QC, Canada)     | FMVUM | STR, ERY, GEN, TMP                     |
| M15448-11   | Brook trout (QC, Canada)     | FMVUM | STR, AMP, TET, CHL                     |
| M16474-11   | Brook trout (QC, Canada)     | FMVUM | STR, AMP, TET, ERY, CHL                |
| M19878-11   | Brook trout (QC, Canada)     | FMVUM | STR, ERY, GEN, TMP                     |
| M11500-11   | Brook trout (QC, Canada)     | FMVUM | -                                      |
| M16486-11   | Brook trout (QC, Canada)     | FMVUM | ERY                                    |
| M13460-11   | Brook trout (QC, Canada)     | FMVUM | -                                      |
| M13729-11   | Brook trout (QC, Canada)     | FMVUM | -                                      |
| M14481-11   | Brook trout (QC, Canada)     | FMVUM | SXT, STR, AMP, TET, CHL                |
| M15879-11   | Brook trout (QC, Canada)     | FMVUM | SXT, STR, AMP, TET, CHL                |
| M17739-11   | Brook trout (QC, Canada)     | FMVUM | SXT, STR, AMP, TET, CHL                |
| M13732-11   | Brook trout (QC, Canada)     | FMVUM | STR, AMP, TET, CHL                     |
| M17053-11   | Brook trout (QC, Canada)     | FMVUM | STR, AMP, TET, CHL                     |
| M15878-11   | Rainbow trout (QC, Canada)   | FMVUM | -                                      |
| M13182-11   | Atlantic salmon (QC, Canada) | FMVUM | -                                      |
| M17735-11   | Brook trout (QC, Canada)     | FMVUM | -                                      |
| M15576-11   | Brown trout (QC, Canada)     | FMVUM | -                                      |
| M15469-11   | Brook trout (QC, Canada)     | FMVUM | STR, AMP, TET, CHL                     |
| M22710-11   | Brook trout (QC, Canada)     | FMVUM | -                                      |
| M13764-11   | Brook trout (QC, Canada)     | FMVUM | -                                      |
| M23911-11   | Brook trout (QC, Canada)     | FMVUM | -                                      |

a. \*: Further information not known or not traceable.

b. FMVUM: Laboratoire de bactériologie clinique, Faculté de médecine vétérinaire, Université de Montréal (Montreal, QC, Canada); FHRC: Félix d'Hérelle Reference Center, Département de biochimie, de microbiologie et de bio-informatique, Université Laval (Quebec City, QC, Canada); MAPAQ: Ministère de l'Agriculture, des Pêcheries et de l'Alimentation du Québec; FOC: Aquatic Animal Health Department, Fisheries and Oceans Canada (NB, Canada); NB: New Brunswick; NS: Nova Scotia; QC: Quebec.

c. NAL = nalidixic acid, SXT = sulfamethoxazole/trimethoprim, STR, = streptomycin, AMP = ampicillin, TET = tetracycline, ERY = erythromycin, GEN = gentamycin, TMP = trimethoprim, and CHL = chloramphenicol.

## References

1. **Daher, R. K., Filion, G., Tan, S. G., Dallaire-Dufresne, S., Paquet, V. E., and Charette, S. J.** 2011. Alteration of virulence factors and rearrangement of pAsa5 plasmid caused by the growth of *Aeromonas salmonicida* in stressful conditions. *Vet Microbiol* **152**, 353-360. doi:10.1016/j.vetmic.2011.04.034.
2. **Dautremepuits, C., Fortier, M., Croisetièrre, S., Belhumeur, P., and Fournier, M.** 2006. Modulation of juvenile brook trout (*Salvelinus fontinalis*) cellular immune system after *Aeromonas salmonicida* challenge. *Vet Immunol Immunopathol* **110**, 27-36. doi: 10.1016/j.vetimm.2005.09.008

3. **Udey, R.** 1978. Pathogenic , antigenic, and immunogenic properties of *Aeromonas salmonicida* studied in juvenile Coho salmon (*Oncorhynchus kisutch*). Ph. D. thesis. Oregon State University, Corvallis, OR
4. **Popoff, M.** 1971. Etude sur les *Aeromonas salmonicida*. II. Caractérisation des bactériophages actifs sur les *Aeromonas salmonicida* et lysotypie. *Ann. Rech. Vétér.* **2**, 33-45
5. **Dacanay, A., Knickle, L., Solanky, K. S., Boyd, J. M., Walter, J. A., Brown, L. L., Johnson, S. C., and Reith, M.** 2006. Contribution of the type III secretion system (TTSS) to virulence of *Aeromonas salmonicida* subsp. *salmonicida*. *Microbiology* **152**, 1847-1856. doi: 10.1099/mic.0.28768-0.

**Table S2.** Primers used in this study.

| Primer                                                           | Sequence (5'-3')            | Reference  |
|------------------------------------------------------------------|-----------------------------|------------|
| <b>PCR positive control (<i>tapA</i> gene on the chromosome)</b> |                             |            |
| <i>tapA</i> F                                                    | ACATGAAGAAGCAATCAGGC        | (1)        |
| <i>tapA</i> R                                                    | AGAGGTCATGCGTTAGCAG         | (1)        |
| <b>PCR for the detection of pAB5S9</b>                           |                             |            |
| ORF101-strB_F1 <sup>a</sup>                                      | CTCGTGAATGTCGGTATCCTGTCT    | This study |
| ORF101-strB_R1 <sup>a</sup>                                      | CTCGGTGCTGAGAACAATCTGATG    | This study |
| parA-resA_F1                                                     | CGTCAATGATGATGTGGTCGTACC    | This study |
| parA-resA_R1                                                     | CTGATCGACCAGGAAGGCTATAGC    | This study |
| ORF397-tnp_F1                                                    | TGTTAGCACTCGGTTGCCTTCGAT    | This study |
| ORF397-tnp_R1                                                    | GACATACACACCGTCGAGAAACAG    | This study |
| <b>PCR for the detection of pSN254</b>                           |                             |            |
| tnp-urf2_F1 <sup>b</sup>                                         | CATTTTCGGTTCGACCATACGACGATC | This study |
| tnp-urf2_R1 <sup>b</sup>                                         | CTGCGTGTGCTGCAAGGAAATCC     | This study |
| traC_F1                                                          | CTACGACAATGGCTTGATCCAAGAC   | This study |
| traC_R1                                                          | GTACAGAATGGCAGGCAGTTGAGG    | This study |
| ORF1417_F1                                                       | CGAGACCTTCCCTTTACTGATGC     | This study |
| ORF1417_R1                                                       | CAGACAGAGGACGAGTTGTAGAAC    | This study |
| <b>PCR for the detection of pAsa4</b>                            |                             |            |
| DD1-pAsa4-traG-F1                                                | AGGTTGCTCTGGAAAGCCTCTGAT    | This study |
| DD2-pAsa4-traG-R1                                                | TGTGGATGCCTGTGCTCTCCATTA    | This study |
| <b>PCR for the detection of pAsa5</b>                            |                             |            |
| ati2-F                                                           | TTGACCTGTGGTCAGGTTAGCAGT    | (2)        |
| ati2-R                                                           | ACACGATGATACGCACCTAGCCAA    | (2)        |
| acrV-F                                                           | GTAAAGGGTTGCGGGATGAG        | (1)        |
| acrV-R                                                           | GCCGCTCTTCTTCAGGTCAC        | (1)        |
| <b>PCR for the characterization of pRAS3</b>                     |                             |            |
| Reg_1_F2                                                         | GGATAGTCGATCTGCTGGATACG     | This study |
| Reg_1_R2                                                         | CTACCCTGTGGAACACCTACATCT    | This study |
| Reg_2_F1                                                         | CGTTGTGGATGTGCTTCAGCAATC    | This study |
| Reg_2_R1                                                         | GAGTGGTTGAGCAATACAGGATGC    | This study |

a. The ORF101-strB primers were designed to give different amplicon sizes in pAB5S9 and pAB5S9b.

b. The tnp-urf2 primers were specific to pSN254b.

#### References

1. **Ebanks, R. O., Knickle, L. C., Goguen, M., Boyd, J. M., Pinto, D. M., Reith, M., and Ross, N. W.** 2006. Expression of and secretion through the *Aeromonas salmonicida* type III secretion system. *Microbiology* **152**, 1275-1286. doi: 10.1099/mic.0.28485-0.
2. **Daher, R. K., Filion, G., Tan, S. G., Dallaire-Dufresne, S., Paquet, V. E., and Charette, S. J.** 2011. Alteration of virulence factors and rearrangement of pAsa5 plasmid caused by the growth of *Aeromonas salmonicida* in stressful conditions. *Vet Microbiol* **152**, 353-360. doi:10.1016/j.vetmic.2011.04.034.
